# Supplementary material for: Heightened Plasma Levels of Transforming Growth Factor Beta (TGF-β) and Increased Degree of Systemic Biochemical Perturbation Characterizes Hepatic Steatosis in Overweight Pediatric Patients: A Cross-Sectional Study
Source: PubMed Central journal article supplement (PMC7352859; doi:10.3390/nu12061650), 2020-06-02
Supplement: nutrients-12-01650-s001.pdf [file nutrients-12-01650-s001.pdf]

**Table S1. Characteristics of the study participants**

| <b>Characteristic</b>                      | <b>No steatosis</b>   | <b>Steatosis</b>      | <b>P-value</b> |
|--------------------------------------------|-----------------------|-----------------------|----------------|
| N                                          | 36                    | 36                    |                |
| Age – y                                    | 12.5 (10.2-14.7)      | 14.0 (12.0-16.0)      | <b>0.0096</b>  |
| Male – no. (%)                             | 16 (44.4)             | 20 (55.7)             | 0.4798         |
| Metabolic Syndrome – no. (%)               | 2 (5.6)               | 8 (22.2)              | 0.0850         |
| Severe obesity – no. (%)                   | 12 (33.3)             | 19 (52.8)             | 0.1530         |
| BMI/age- (Z- score)                        | 2.59 (2.17 – 3.14)    | 3.01 (2.57 – 3.44)    | <b>0.0122</b>  |
| WC > 90 <sup>th</sup> percentile – no. (%) | 26 (72.2)             | 31 (86.1)             | 0.2450         |
| Waist circumference (WC) - cm              | 87.8 (82.3 – 97.5)    | 101.0 (92.5 – 110.1)  | <b>0.0003</b>  |
| Systemic Arterial Hypertension - no. (%)   | 2 (5.6)               | 10 (27.8)             | <b>0.0238</b>  |
| Systolic blood pressure - mmHg             | 115.5 (107.5 – 121.5) | 114.5 (105.5 – 123.0) | 0.8791         |
| Diastolic blood pressure - mmHg            | 70.0 (64.5 – 73.5)    | 70.0 (62.5 – 79.5)    | 0.5614         |

Data represent median and interquartile range (continuous variables) or frequency (categorical variables). The Mann-Whitney *U* test was used to compare age, anthropometric data and blood pressure distribution between the groups and the Fisher's exact test was used to compare frequency of male individuals and comorbidities frequency between the groups. *P*-values in bold font are statistically significant.

**Table S2. Median values of measured plasma markers**

| Biomarker            | Unit   | No steatosis           | Steatosis              | P-value       |
|----------------------|--------|------------------------|------------------------|---------------|
| Hematocrit           | %      | 38.9<br>(36.5-40.4)    | 38.8<br>(37.5-41.5)    | 0.4014        |
| Hemoglobin           | g/dL   | 13.1<br>(12.3-13.8)    | 13.2<br>(12.7-14.2)    | 0.1969        |
| Glucose              | mg/dL  | 87.3<br>(84.1-91.8)    | 87.3<br>(84.4-91.5)    | 0.9282        |
| Insulin              | UI/mL  | 15.2<br>(9.4-24.0)     | 16.1<br>(9.5-22.4)     | 0.7270        |
| Homa-IR              | -      | 3.4<br>(2.2 – 4.9)     | 3.5<br>(2.1 – 4.5)     | 0.6769        |
| Total Cholesterol    | mg/dL  | 159.0<br>(140.5-180.0) | 157.5<br>(123.5-181.5) | 0.2414        |
| HDL-c                | mg/dL  | 41.0<br>(37.2-47.0)    | 39.35<br>(33.0-45.7)   | 0.0953        |
| LDL-c                | mg/dL  | 89.6<br>(79.8-113.5)   | 91.5<br>(71.0-108.3)   | 0.3440        |
| Triglycerides        | mg/dL  | 82.5<br>(71.0-124.3)   | 97.5<br>(79.0-145.5)   | 0.1990        |
| Urea                 | mg/dL  | 22.0<br>(19.0-26.7)    | 21.0<br>(18.0-25.5)    | 0.4428        |
| Creatinine           | mg/dL  | 0.63<br>(0.60-0.70)    | 0.64<br>(0.57-0.79)    | 0.6563        |
| AST                  | U/L    | 19.1<br>(17.0-23.9)    | 21.0<br>(18.0-26.5)    | 0.3489        |
| ALT                  | U/L    | 16.0<br>(12.2-21.8)    | 24.4<br>(18.4-33.6)    | <b>0.0008</b> |
| GGT                  | U/L    | 18.0<br>(16.0-23.0)    | 25.0<br>(17.2-36.5)    | <b>0.0185</b> |
| Alkaline Phosphatase | U/L    | 256.2<br>(134.3-327.5) | 189.5<br>(89.5-264.8)  | 0.0514        |
| Albumin              | g/dL   | 4.4<br>(4.2-4.6)       | 4.45<br>(4.3-4.7)      | 0.3540        |
| Direct Bilirubin     | g/dL   | 0.16<br>(0.13-0.22)    | 0.16<br>(0.12-0.20)    | 0.4770        |
| Indirect Bilirubin   | g/dL   | 0.17<br>(0.10-0.24)    | 0.17<br>(0.10-0.29)    | 0.9955        |
| TSH                  | μUL/ml | 2.2<br>(1.6-3.0)       | 2.0<br>(1.45-3.23)     | 0.5246        |
| ft4                  | ng/dL  | 1.2<br>(1.0-1.3)       | 1.16<br>(1.06-1.26)    | 0.5580        |
| Ferritin             | ng/mL  | 68.1<br>(43.7-81.9)    | 72.2<br>(42.4-108.5)   | 0.2771        |
| Vitamin D            | ng/mL  | 21.7<br>(19.1-24.8)    | 20.5<br>(18.1-24.3)    | 0.4850        |
| us-CRP               | mg/dL  | 0.25<br>(0.10-0.62)    | 0.25<br>(0.09-0.50)    | 0.9148        |
| TGF-β                | pg/mL  | 4.58<br>(0.11-15.3)    | 539.0<br>(31.3-706.1)  | <b>0.0001</b> |
| HO-1                 | pg/mL  | 47.9<br>(12.1-98.4)    | 24.1<br>(11.1-68.9)    | 0.3384        |

The Mann-Whitney *U* test was used to compare continuous variables between the groups. P-values in bold font were statistically significant.

**Table S3. Concentration of parameters according to grade of hepatic steatosis**

| Parameter            | Unit              | Hepatic steatosis      |                        |                        | P-value       | Post-test result |
|----------------------|-------------------|------------------------|------------------------|------------------------|---------------|------------------|
|                      |                   | No                     | Mild                   | Moderate/<br>Severe    |               |                  |
| Body Mass Index      | Kg/m <sup>2</sup> | 28.6<br>(26.2-33.2)    | 31.4<br>(28.6-34.9)    | 38.1<br>(35.1-40.1)    | <b>0.0005</b> | <b>b</b>         |
| BMI/age              | Z score           | 2.6<br>(2.2 – 3.1)     | 2.9<br>(2.6 – 3.3)     | 3.4<br>(3.1 – 3.7)     | <b>0.0080</b> | <b>b</b>         |
| Hematocrit           | %                 | 38.9<br>(36.5-40.4)    | 38.4<br>(37.4-41.9)    | 39.4<br>(37.8-40.9)    | 0.6665        | ns               |
| Hemoglobin           | g/dL              | 13.1<br>(12.3-13.8)    | 13.2<br>(12.6-14.4)    | 13.2<br>(12.8-14.2)    | 0.3985        | ns               |
| Glucose              | mg/dL             | 87.3<br>(84.1-91.8)    | 85.9<br>(83.8-90.5)    | 89.7<br>(86.5-91.8)    | 0.2948        | ns               |
| Insulin              | UI/mL             | 15.2<br>(9.4-24.0)     | 16.8<br>(9.34-22.7)    | 15.4<br>(9.5-21.4)     | 0.8844        | ns               |
| Homa-IR              | -                 | 3.4<br>(2.2 – 4.9)     | 3.7<br>(2.1 – 4.8)     | 3.3<br>(2.6 – 4.5)     | 0.8574        | ns               |
| Total Cholesterol    | mg/dL             | 159.0<br>(140.5-180.0) | 157.5<br>(119.3-181.5) | 154<br>(135.8-180.5)   | 0.4939        | ns               |
| HDL                  | mg/dL             | 41.0<br>(37.2-47.0)    | 40.5<br>(34.7-46.8)    | 37.5<br>(30.5-40.0)    | 0.0736        | ns               |
| LDL                  | mg/dL             | 89.6<br>(79.8-113.5)   | 86.5<br>(68.0-108.3)   | 95.5<br>(83.3-116.0)   | 0.4842        | ns               |
| Triglycerides        | mg/dL             | 82.5<br>(71.0-124.3)   | 97.5<br>(74.5-195.8)   | 107.5<br>(81.0-134.3)  | 0.4278        | ns               |
| Urea                 | mg/dL             | 22.0<br>(19.0-26.7)    | 21.0<br>(17.0-27.7)    | 21.5<br>(19.0-25.5)    | 0.6584        | ns               |
| Creatinine           | mg/dL             | 0.63<br>(0.60-0.70)    | 0.63<br>(0.57-0.78)    | 0.69<br>(0.55-0.80)    | 0.8367        | ns               |
| AST                  | U/L               | 19.1<br>(17.0-23.9)    | 19.5<br>(17.0-27.7)    | 22.5<br>(20.2-24.7)    | 0.2614        | ns               |
| ALT                  | U/L               | 16.0<br>(12.2-21.8)    | 22.0<br>(15.0-33.6)    | 25.0<br>(21.0-37.5)    | <b>0.0016</b> | <b>a; b</b>      |
| GGT                  | U/L               | 18.0<br>(16.0-23.0)    | 25.0<br>(17.0-35.0)    | 25.0<br>(20.5-37.7)    | 0.0576        | ns               |
| Alkaline Phosphatase | U/L               | 256.2<br>(134.3-327.5) | 206.4<br>(104.0-310.8) | 138.0<br>(81.0-248.5)  | 0.0662        | ns               |
| Albumin              | g/dL              | 4.4<br>(4.2-4.6)       | 4.45<br>(4.30-4.70)    | 4.45<br>(4.15-4.60)    | 0.6382        | ns               |
| Direct Bilirubin     | g/dL              | 0.16<br>(0.13-0.22)    | 0.15<br>(0.11-0.19)    | 0.17<br>(0.12-0.21)    | 0.7231        | ns               |
| Indirect Bilirubin   | g/dL              | 0.17<br>(0.10-0.24)    | 0.17<br>(0.05-0.25)    | 0.17<br>(0.10-0.42)    | 0.8829        | ns               |
| TSH                  | μUL/mL            | 2.2<br>(1.6-3.0)       | 2.3<br>(1.8-3.35)      | 1.48<br>(1.35-1.71)    | 0.0730        | ns               |
| FT4                  | ng/dL             | 1.2<br>(1.0-1.3)       | 1.2<br>(1.05-1.28)     | 1.13<br>(1.07-1.21)    | 0.7506        | ns               |
| Ferritin             | ng/mL             | 68.1<br>(43.7-81.9)    | 73.7<br>(44.9-120.0)   | 72.2<br>(41.2-101.8)   | 0.4829        | ns               |
| Vitamin D            | ng/mL             | 21.7<br>(19.1-24.8)    | 20.5<br>(18.2-24.2)    | 20.6<br>(14.9-24.4)    | 0.7230        | ns               |
| CRP                  | mg/dL             | 0.25<br>(0.10-0.62)    | 0.20<br>(0.08-0.41)    | 0.46<br>(0.10-0.76)    | 0.5051        | ns               |
| TGF-β                | pg/mL             | 4.58<br>(0.11-15.3)    | 579.6<br>(20.67-796.2) | 521.8<br>(73.52-637.3) | <b>0.0001</b> | <b>a; b</b>      |
| HO-1                 | pg/mL             | 47.9<br>(12.9-98.4)    | 22.0<br>(11.0-65.5)    | 30.32<br>(10.0-110.6)  | 0.5385        | ns               |

Data represent medians and interquartile ranges. Data was analyzed using Kruskal-Wallis test with Dunn's multiple comparisons. P-values in bold font were statistically significant. *Ad hoc* comparisons with P-value <0.05: <sup>a</sup>No steatosis vs. Mild steatosis, <sup>b</sup>No steatosis vs. Moderate/Severe steatosis. ns: nonsignificant.

**Figure S1. Overall profile of concentrations of biochemical parameters according to occurrence of hepatic steatosis and degree of obesity.**

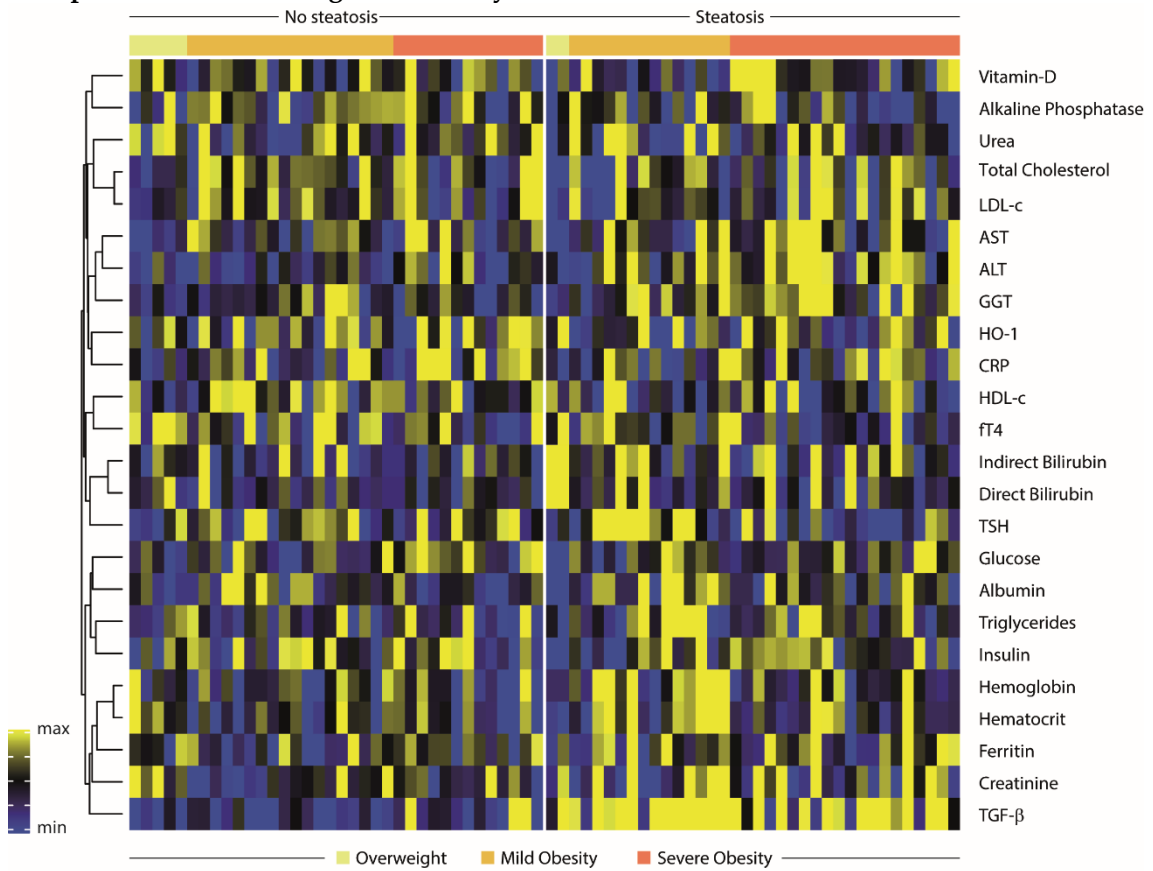

Values of indicated parameters were assessed in samples from patients without hepatic steatosis (n=36) and patients with hepatic steatosis (n=36), who were ordered according to degree of obesity. Data were Log10 transformed and z-score normalized. A hierarchical cluster analysis (Ward's method with 100X bootstrap) was employed to test whether there were differences in the overall expression profile of the biochemical parameters in the study population.

**Figure S2. Correlations between values of BMI/age, ALT and TGF- $\beta$  in the study population.**

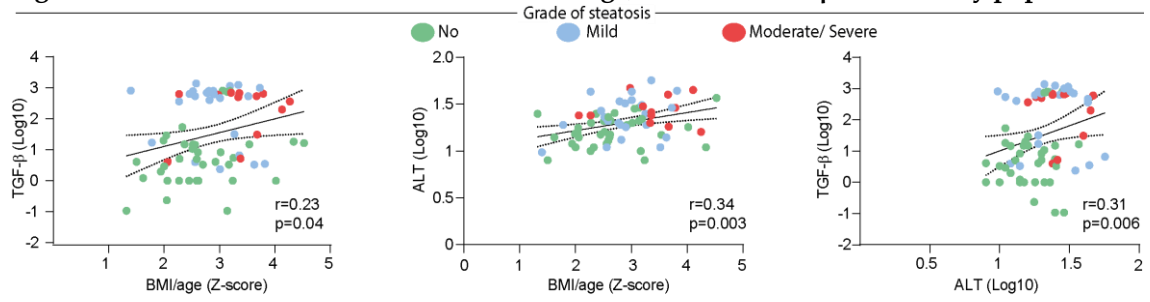

Data were analyzed using the Spearman correlation rank test. Lines represent linear curve fit with 95% confidence intervals.

**Figure S3. Degree of biochemical perturbation of each biomarker according to grade of hepatic steatosis.**

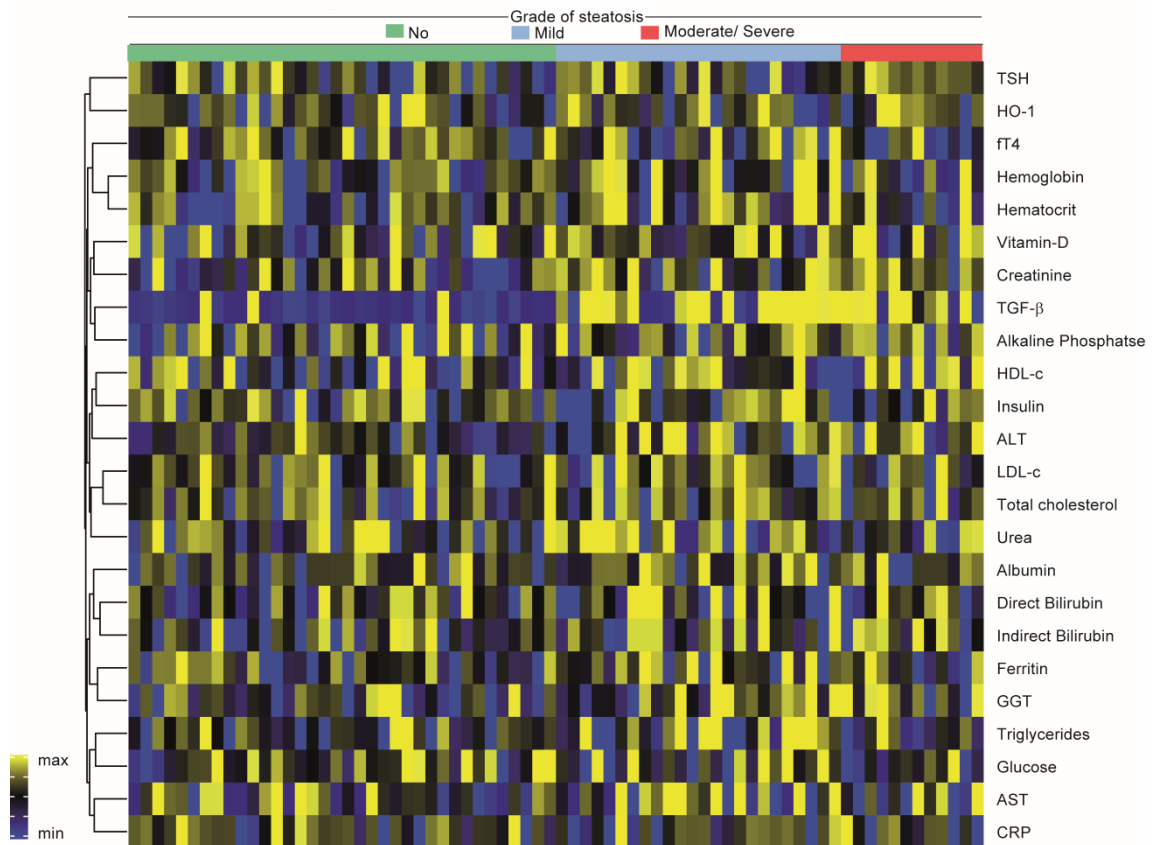

A one-way hierarchical cluster analysis (Ward's method with 100X bootstrap) using data on degree of biochemical perturbation calculated for each individual parameter was employed to visualize the profiles potentially associated degree of steatosis. To plot the heatmap, data were log<sub>10</sub>-transformed, and z-score normalized.

**Figure S4. Degree of biochemical perturbation of each biomarker according to degree of obesity.**

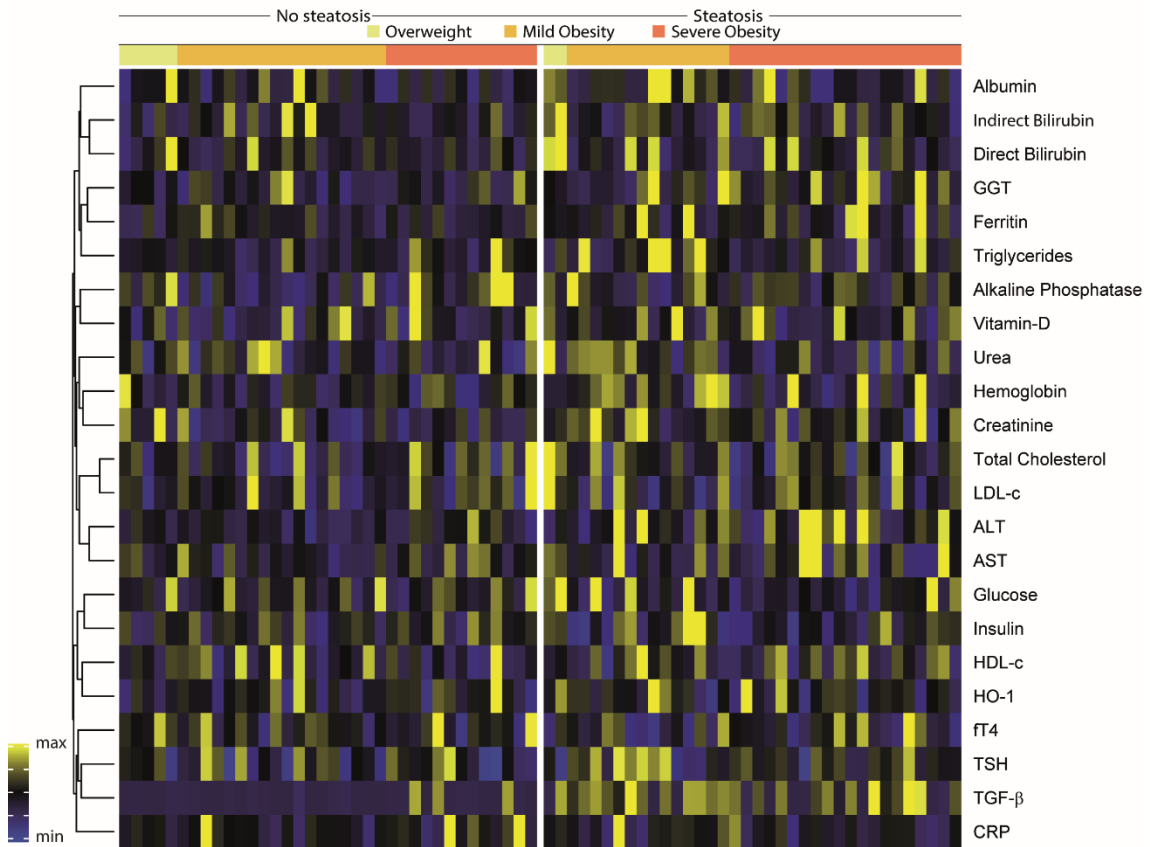

A one-way hierarchical cluster analysis (Ward's method with 100X bootstrap) using data on degree of biochemical perturbation calculated for each individual parameter was employed to visualize the profiles potentially associated degree of obesity. To plot the heatmap, data were log<sub>10</sub>-transformed, and z-score normalized.
